# Supplementary material
Source: publisher figshare collection journal article supplement (https://acs.figshare.com/ndownloader/files/3983959)
Supplement: Supplementary file 1 [file 3983959]

## Supporting information for

# Platinum(II) Complexes with Novel Diisocyanide Ligands: Catalysts in Alkyne Hydroarylation

*Daniele Vicenzi,<sup>†</sup> Paolo Sgarbossa,<sup>‡\*</sup> Andrea Biffis,<sup>†</sup> Cristina Tubaro,<sup>†\*</sup> Marino Basato,<sup>†</sup> Rino A. Michelin,<sup>‡</sup> Arianna Lanza,<sup>†</sup> Fabrizio Nestola,<sup>§</sup> Sara Bogialli,<sup>†</sup> Paolo Pastore,<sup>†</sup> Alfonso Vanzo<sup>||</sup>*

<sup>†</sup> Dipartimento di Scienze Chimiche, Università di Padova, via Marzolo 1, 35131 Padova.

<sup>‡</sup> Dipartimento di Ingegneria Industriale, Università di Padova, via Marzolo 9, 35131 Padova.

<sup>§</sup> Dipartimento di Geoscienze, Università di Padova, via Gradenigo 6, 35131 Padova.

<sup>||</sup> IENI-CNR, Dipartimento di Scienze Chimiche, Università di Padova, via Marzolo 1, 35131 Padova.

[paolo.sgarbossa@unipd.it](mailto:paolo.sgarbossa@unipd.it) (P.S.); [cristina.tubaro@unipd.it](mailto:cristina.tubaro@unipd.it) (C.T.)

|                                                                                 |        |
|---------------------------------------------------------------------------------|--------|
| Experimental section. General remarks                                           | page 1 |
| Selected crystallographic data for complexes <b>2</b> , <b>1'</b> and <b>2'</b> | page 2 |
| NMR spectra of complexes                                                        | page 3 |

## Experimental Section.

### General remarks

NMR spectra were recorded at 298 K on a Bruker Avance-III 200 MHz (200.13 MHz for  $^1\text{H}$ , 50.32 for  $^{13}\text{C}$ , 81.01 for  $^{31}\text{P}$ ) or on a Bruker Avance DX-400 (400.13 MHz for  $^1\text{H}$  and 100.61 for  $^{13}\text{C}$ ); chemical shifts ( $\delta$ ) are reported in units of ppm relative to  $\text{Si}(\text{CH}_3)_4$  or the residual solvent signals for  $^1\text{H}$  and  $^{13}\text{C}$  NMR spectra, and to 85%  $\text{H}_3\text{PO}_4$  for  $^{31}\text{P}$  NMR spectra. The FT-IR spectra were obtained with a Perkin Elmer Spectrum 100 spectrophotometer, with a resolution of  $2\text{ cm}^{-1}$ . ESI-MS analyses were performed using a LCQ-Duo (Thermo-Finnigan) operating in positive ion mode. Instrumental parameters: capillary voltage 10 V, spray voltage 4.5 kV; capillary temperature  $200\text{ }^\circ\text{C}$ ; mass scan range from 150 to 2000 amu;  $\text{N}_2$  was used as sheath gas; the He pressure inside the trap was kept constant. The pressure directly read by an ion gauge (in the absence of the  $\text{N}_2$  stream) was  $1.33 \times 10^{-5}$  Torr. Sample solutions were prepared by dissolving the compounds in acetonitrile. Sample solutions were directly infused into the ESI source by a syringe pump at  $8\mu\text{L}/\text{min}$  flow rate. Liquid chromatography (LC)-high resolution MS (HRMS) analyses were performed with an UHPLC system (Agilent Series 1200; Agilent Technologies, Palo Alto, CA, USA), consisting of vacuum degasser, auto-sampler, a binary pump coupled to a Quadrupole-Time of Flight mass analyzer (Agilent Series 6520; Agilent Technologies) with an ESI source, using nitrogen gas and operating in positive acquisition, with the following operation parameters: capillary voltage, 3500 V; nebulizer pressure, 35 psi; drying gas,  $8\text{ L min}^{-1}$ ; gas temperature,  $350^\circ\text{C}$ ; fragmentor voltage in the range of 80-200 V; skimmer 65 V.

Analyses were performed injecting a total of  $40\text{ }\mu\text{L}$  ( $8 \times 5\mu\text{L}$  injection volume) of samples by means of an injection program, varying each time the fragmentor voltage. The mobile phase was acetonitrile or acetonitrile 0.1 % HTFA at flow rate of  $0.2\text{ mL min}^{-1}$ . Full scan mass spectra were recorded as centroid over the 50–3000  $m/z$  range with a scan rate of 2 spectra/s. Mass spectra acquisition and data analysis was processed with Masshunter Workstation B 04.00 software (Agilent Technologies).

**Table S1.** Selected crystallographic data for complexes **2**, **1'** and **2'**

| Complex                                                       | <b>2</b>                                                                                 | <b>1'</b>                                                                                | <b>2'</b>                                                                                                      |
|---------------------------------------------------------------|------------------------------------------------------------------------------------------|------------------------------------------------------------------------------------------|----------------------------------------------------------------------------------------------------------------|
| Formula                                                       | C <sub>22</sub> H <sub>12</sub> Cl <sub>2</sub> N <sub>2</sub> O <sub>4</sub> Pt         | C <sub>22</sub> H <sub>19</sub> N <sub>2</sub> O <sub>3</sub> P Pt                       | C <sub>48</sub> H <sub>36</sub> N <sub>4</sub> O <sub>8</sub> Pt <sub>2</sub> ·CH <sub>2</sub> Cl <sub>2</sub> |
| Molecular weight                                              | 634.33                                                                                   | 585.45                                                                                   | 1271.91                                                                                                        |
| Crystal system                                                | Monoclinic                                                                               | Monoclinic                                                                               | Monoclinic                                                                                                     |
| Space group                                                   | <i>P2<sub>1</sub>/c</i>                                                                  | <i>P2<sub>1</sub>/n</i>                                                                  | <i>C 2/c</i>                                                                                                   |
| <i>a</i> /Å                                                   | 14.7441(14)                                                                              | 11.871(1)                                                                                | 26.097(4)                                                                                                      |
| <i>b</i> /Å                                                   | 8.6683(8)                                                                                | 8.358(1)                                                                                 | 12.1200(14)                                                                                                    |
| <i>c</i> /Å                                                   | 16.881(3)                                                                                | 21.583(2)                                                                                | 20.158(3)                                                                                                      |
| $\alpha$ /°                                                   | 90.00                                                                                    | 90.00                                                                                    | 90.00                                                                                                          |
| $\beta$ /°                                                    | 98.386(14)                                                                               | 93.142(5)                                                                                | 130.299(9)°                                                                                                    |
| $\gamma$ /°                                                   | 90.00                                                                                    | 90.00                                                                                    | 90.00                                                                                                          |
| Volume, Å <sup>3</sup>                                        | 2134.4(5)                                                                                | 2138.2(4)                                                                                | 4862.8(13)                                                                                                     |
| <i>Z</i>                                                      | 4                                                                                        | 4                                                                                        | 4                                                                                                              |
| D <sub>calc</sub> /g cm <sup>-3</sup>                         | 1.974                                                                                    | 1.819                                                                                    | 1.737                                                                                                          |
| F(000)                                                        | 1208                                                                                     | 1128                                                                                     | 2456                                                                                                           |
| $\mu$ (Mo-K $\alpha$ )/mm <sup>-1</sup>                       | 6.857                                                                                    | 6.66                                                                                     | 5.91                                                                                                           |
| Reflections collected                                         | 42931                                                                                    | 40575                                                                                    | 49583                                                                                                          |
| Unique reflections                                            | 4652                                                                                     | 3976                                                                                     | 5306                                                                                                           |
| Observed reflections<br>[ <i>I</i> > 2 $\sigma$ ( <i>I</i> )] | 3468<br>[ <i>R</i> <sub>int</sub> = 0.047]                                               | 3368<br>[ <i>R</i> <sub>int</sub> = 0.027]                                               | 3170<br>[ <i>R</i> <sub>int</sub> = 0.078]                                                                     |
| <i>R</i> [ <i>I</i> > 2 $\sigma$ ( <i>I</i> )]                | <i>R</i> <sub>1</sub> (F) = 0.0308,<br><i>wR</i> <sub>2</sub> (F <sup>2</sup> ) = 0.0318 | <i>R</i> <sub>1</sub> (F) = 0.0290,<br><i>wR</i> <sub>2</sub> (F <sup>2</sup> ) = 0.0720 | <i>R</i> <sub>1</sub> (F) = 0.0507,<br><i>wR</i> <sub>2</sub> (F <sup>2</sup> ) = 0.0504                       |
| <i>R</i> [all data]                                           | <i>R</i> <sub>1</sub> (F) = 0.0677,<br><i>wR</i> <sub>2</sub> (F <sup>2</sup> ) = 0.0363 | <i>R</i> <sub>1</sub> (F) = 0.0369,<br><i>wR</i> <sub>2</sub> (F <sup>2</sup> ) = 0.0763 | <i>R</i> <sub>1</sub> (F) = 0.1421,<br><i>wR</i> <sub>2</sub> (F <sup>2</sup> ) = 0.0645                       |
| Goodness of fit on F <sup>2</sup>                             | 0.990                                                                                    | 1.053                                                                                    | 1.059                                                                                                          |

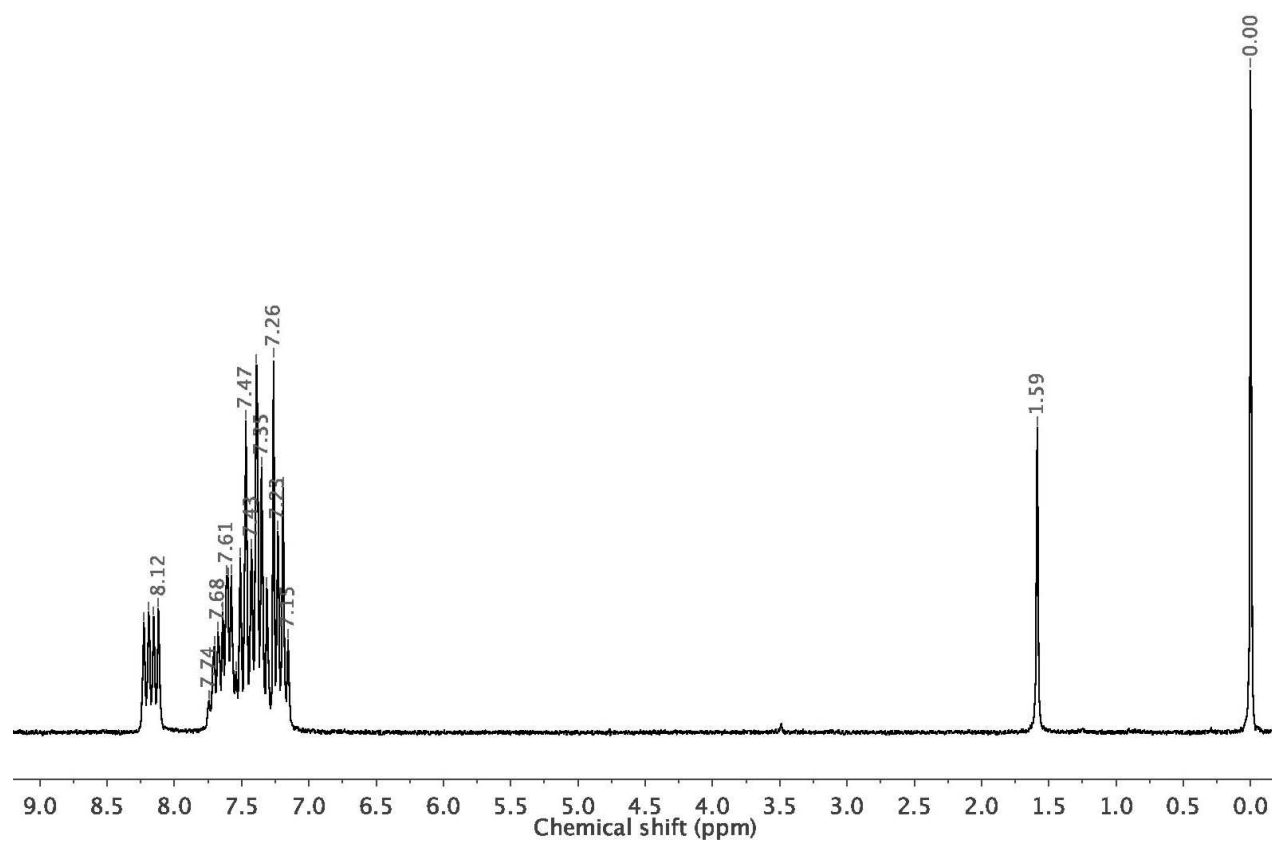

**Figure 1S.** <sup>1</sup>H NMR spectrum of diNC-1 in CDCl<sub>3</sub>.

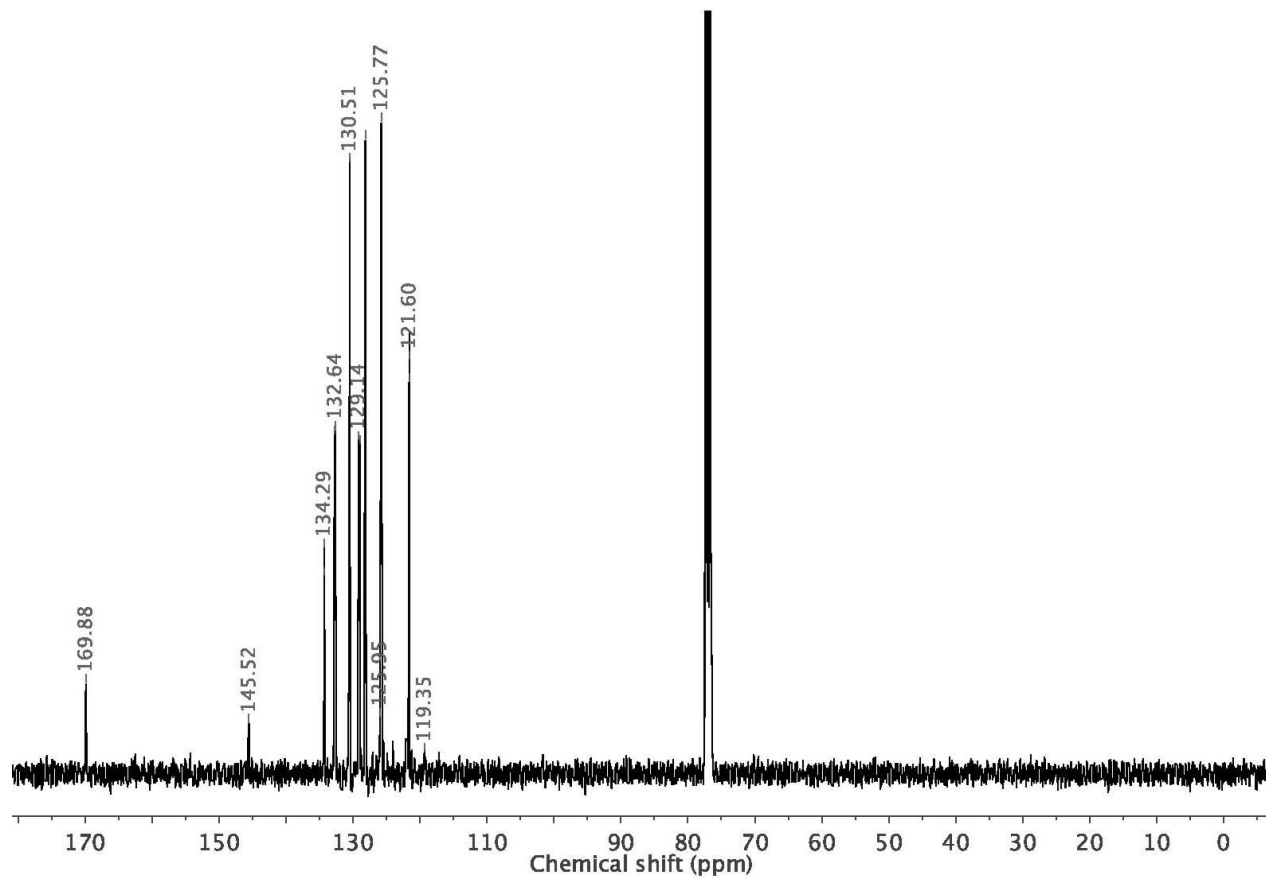

**Figure 2S.** <sup>13</sup>C{<sup>1</sup>H} NMR spectrum of diNC-1 in CDCl<sub>3</sub>.

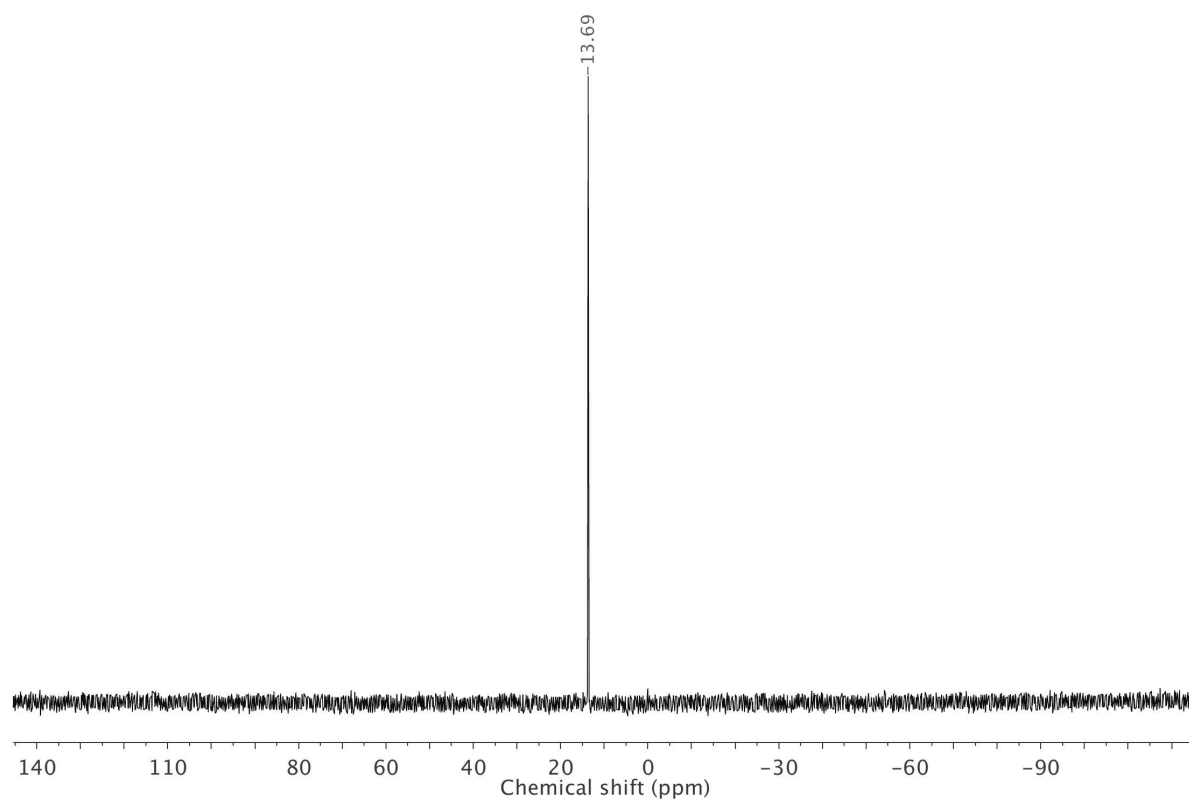

**Figure 3S.**  $^{31}\text{P}\{^1\text{H}\}$  NMR spectrum of diNC-1 in  $\text{CDCl}_3$ .

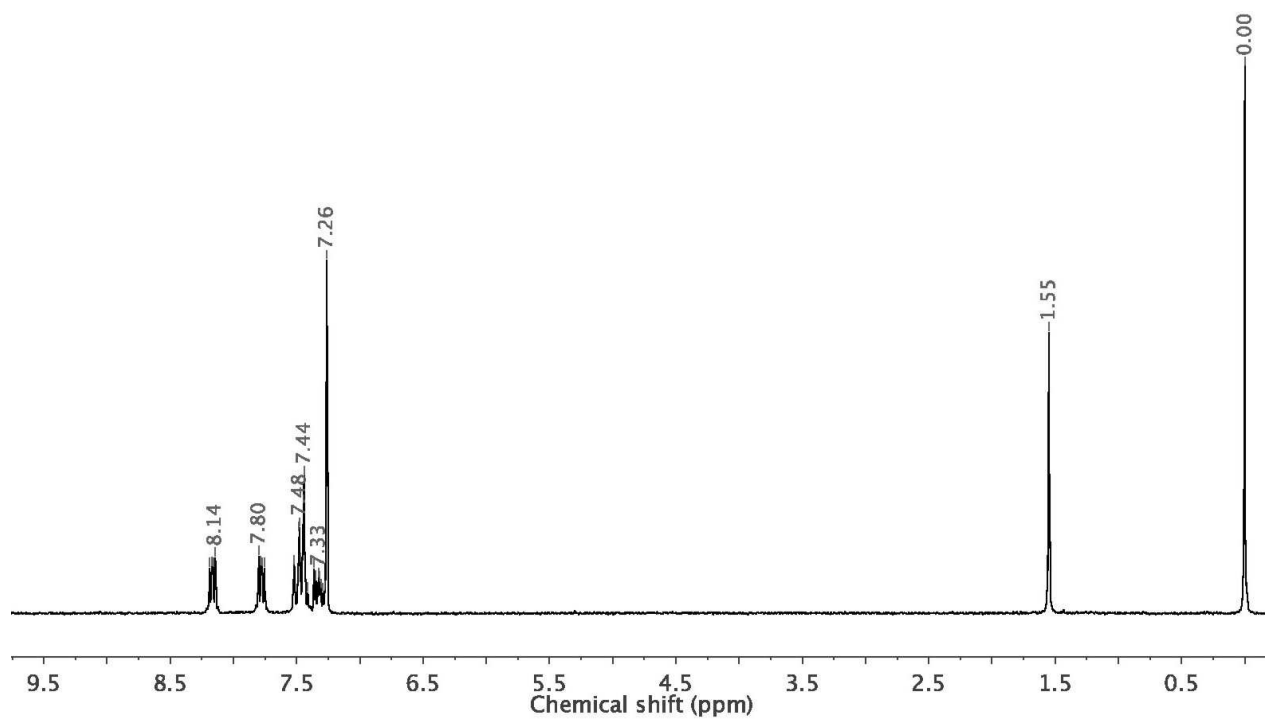

**Figure 4S.** <sup>1</sup>H NMR spectrum of diNC-2 in CDCl<sub>3</sub>.

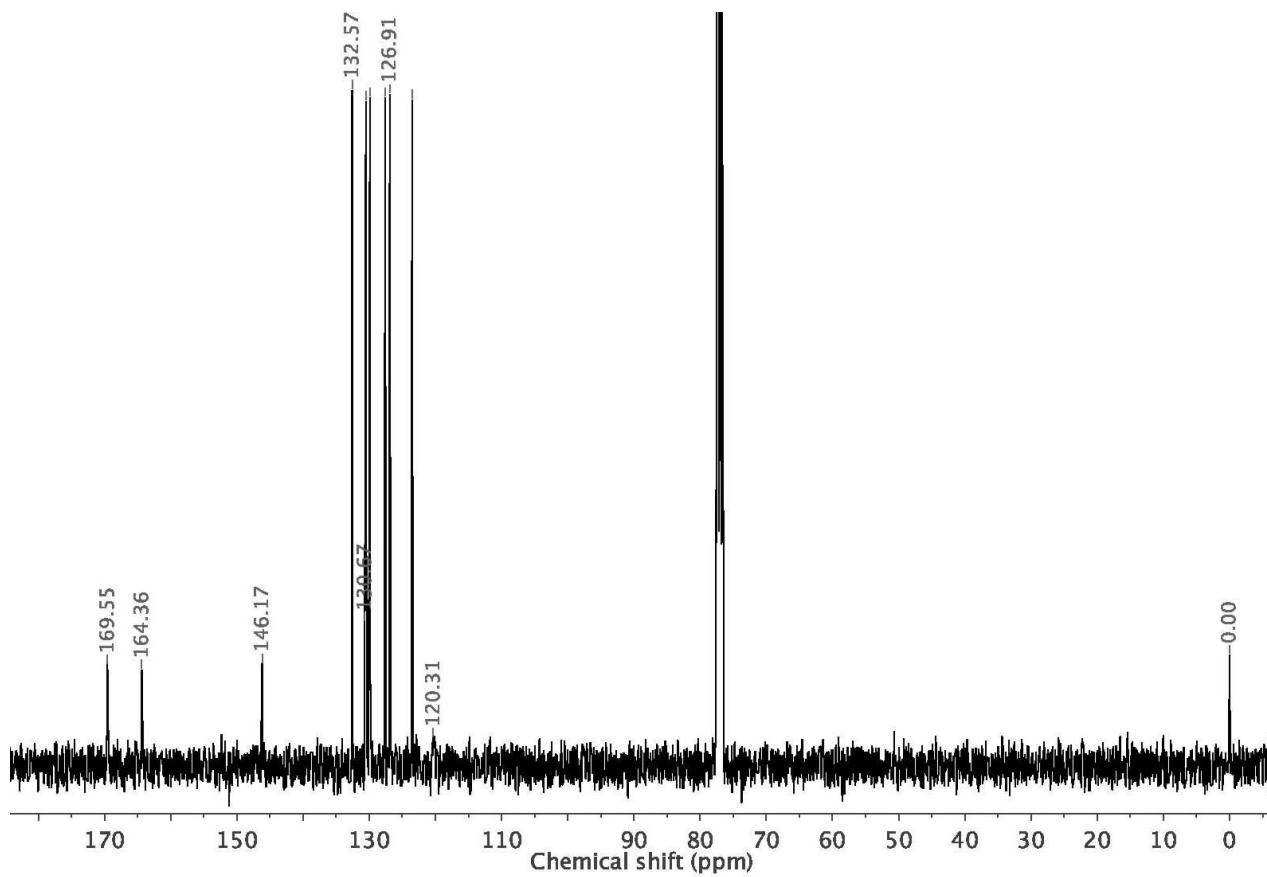

**Figure 5S.** <sup>13</sup>C{<sup>1</sup>H} NMR spectrum of diNC-2 in CDCl<sub>3</sub>.

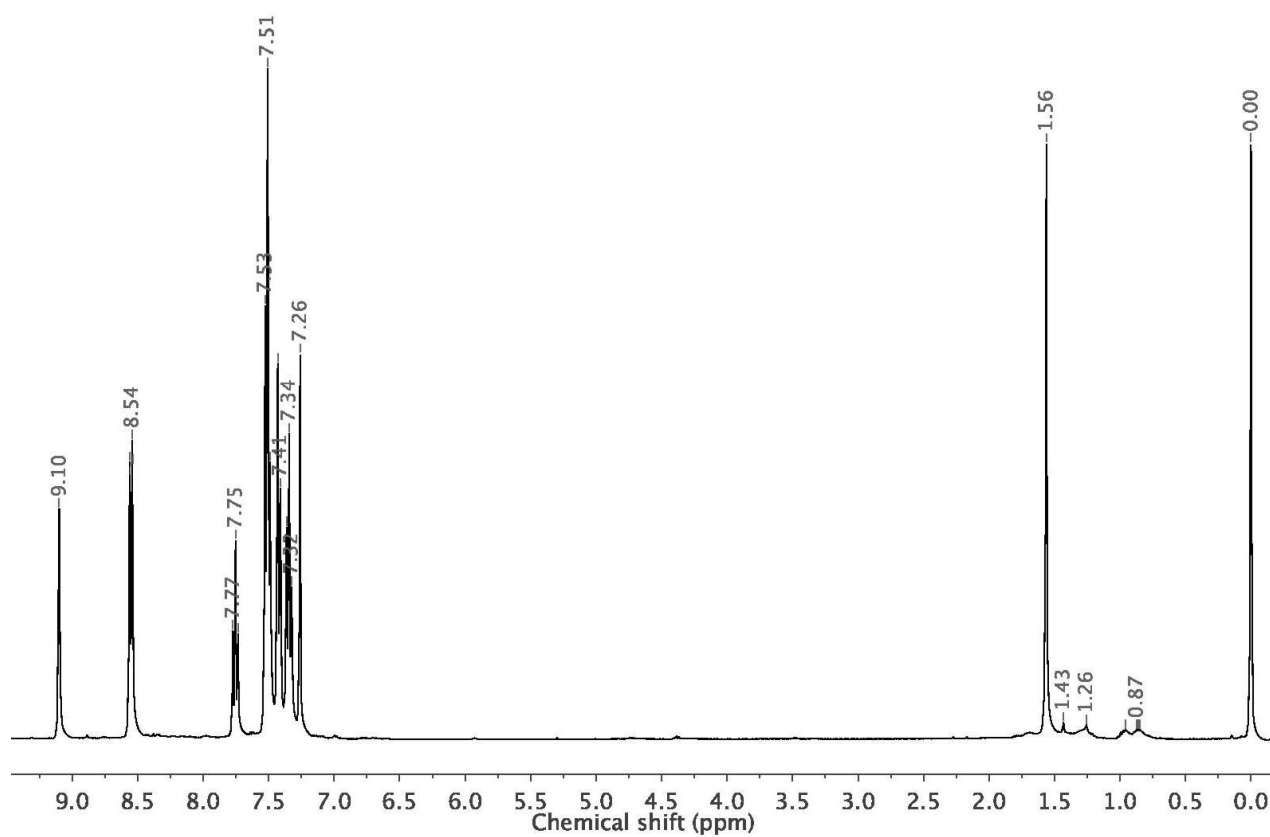

**Figure 6S.** <sup>1</sup>H NMR spectrum of diNC-3 in CDCl<sub>3</sub>.

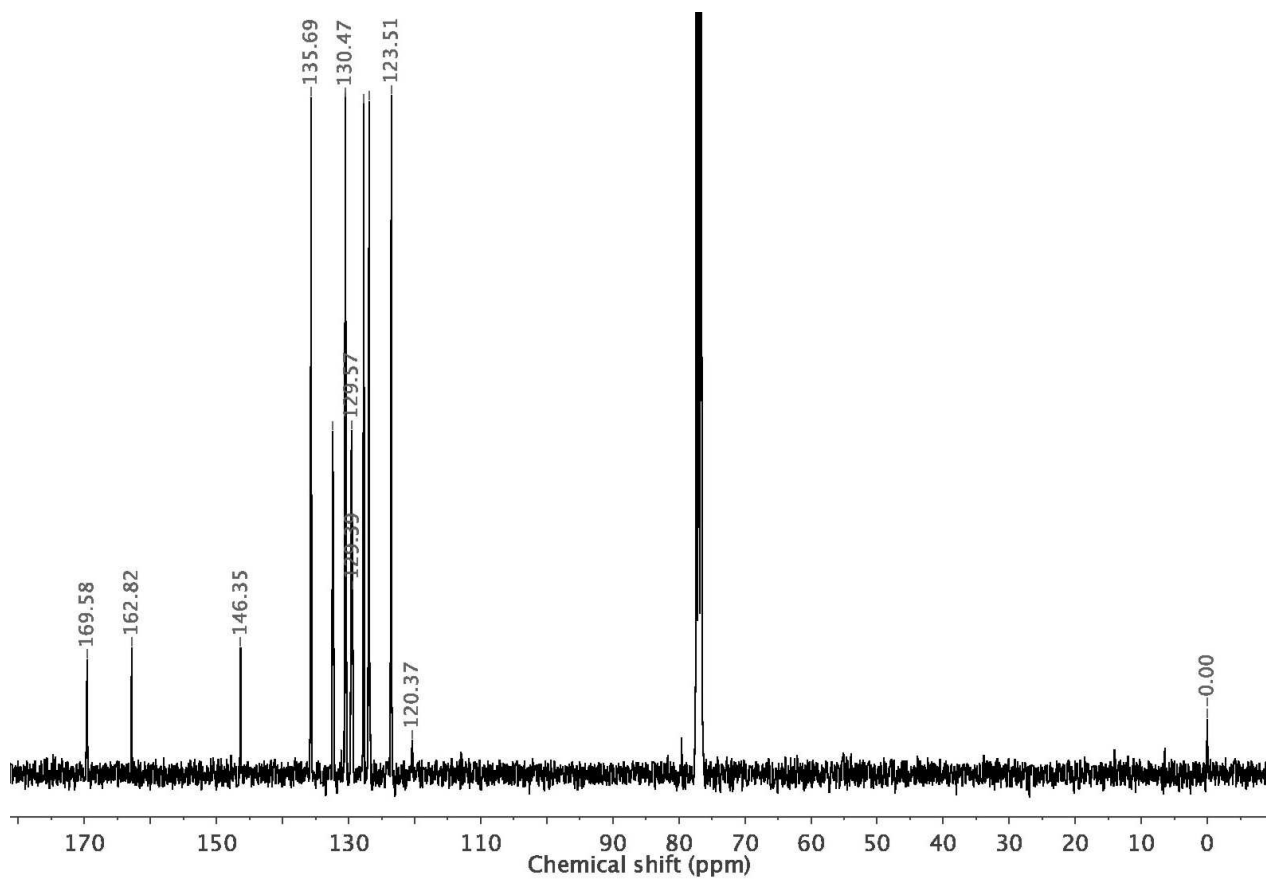

**Figure 7S.** <sup>13</sup>C{<sup>1</sup>H} NMR spectrum of diNC-3 in CDCl<sub>3</sub>.

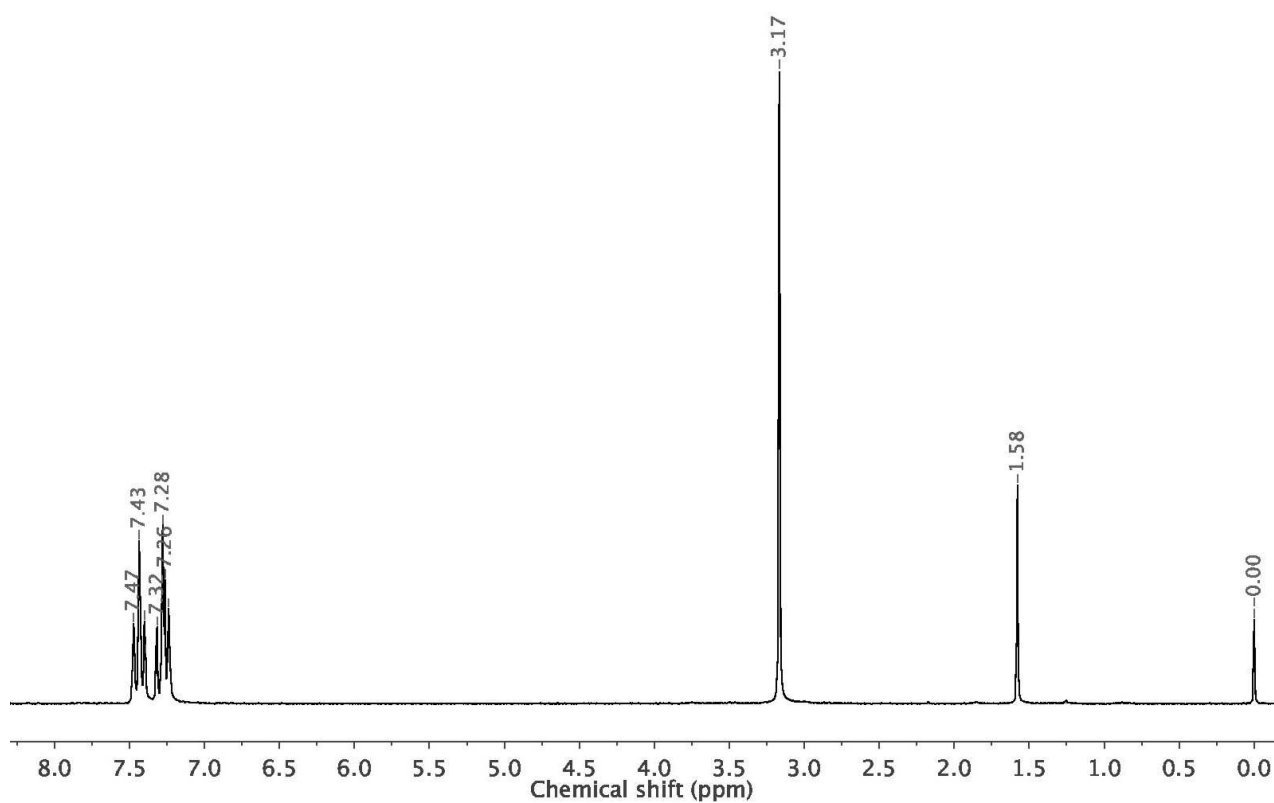

**Figure 8S.** <sup>1</sup>H NMR spectrum of diNC-4 in CDCl<sub>3</sub>.

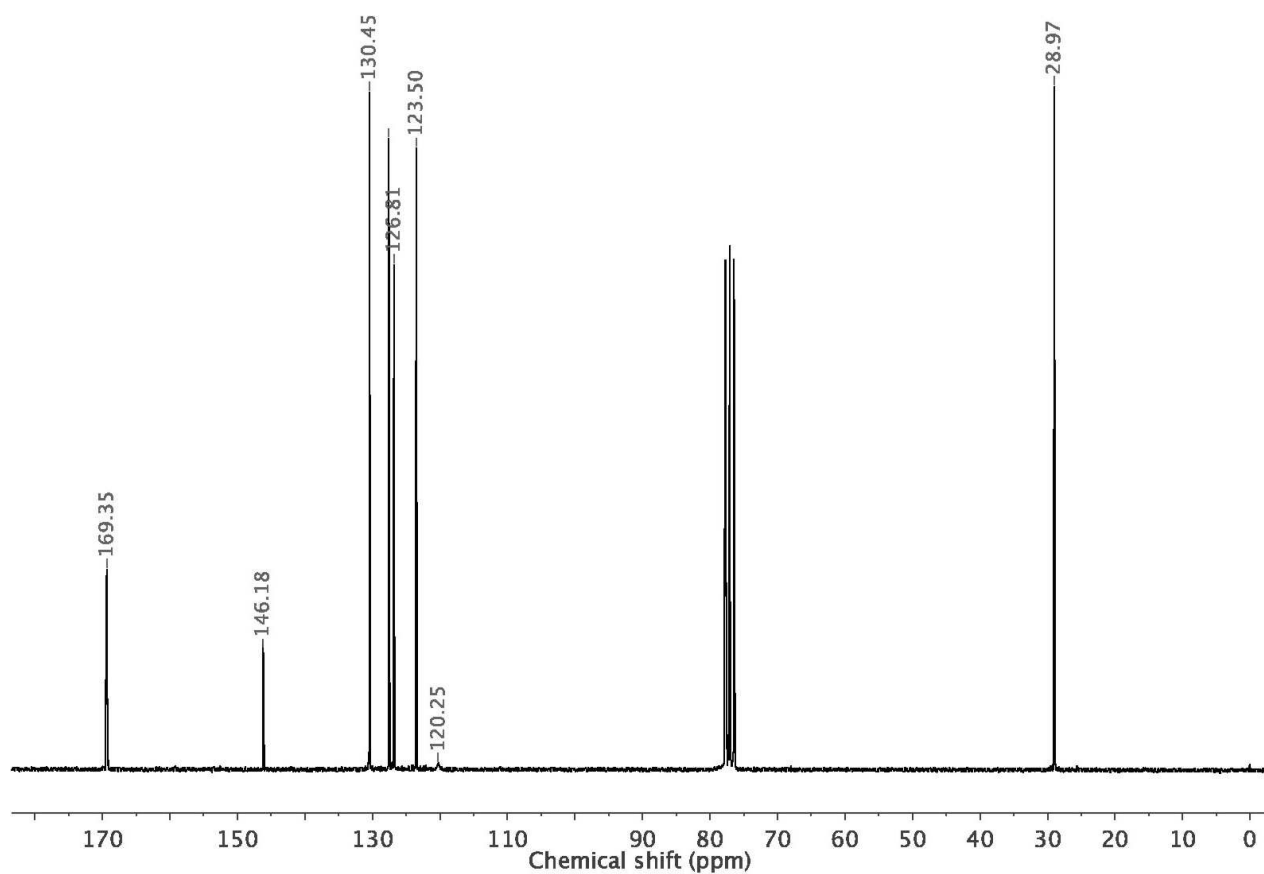

**Figure 9S.** <sup>13</sup>C{<sup>1</sup>H} NMR spectrum of diNC-4 in CDCl<sub>3</sub>.



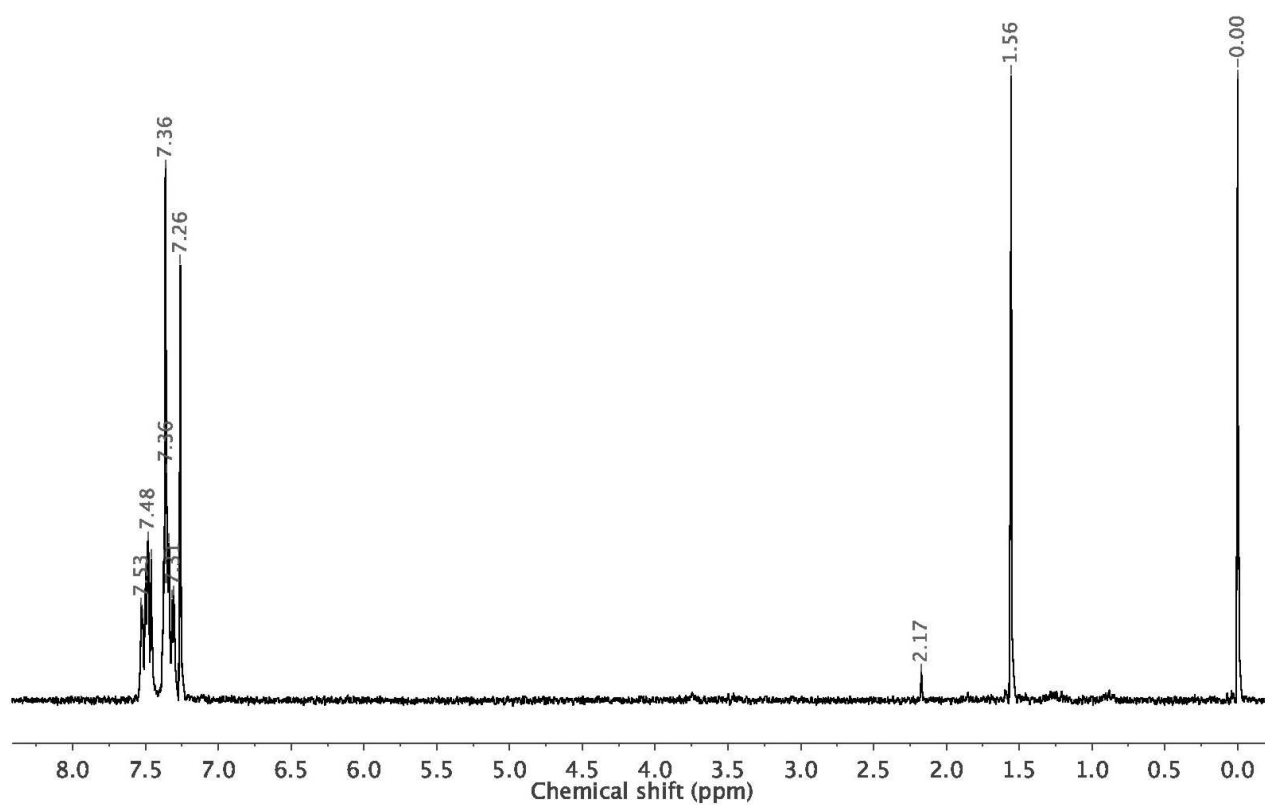

**Figure 10S.** <sup>1</sup>H NMR spectrum of diNC-5 in CDCl<sub>3</sub>.

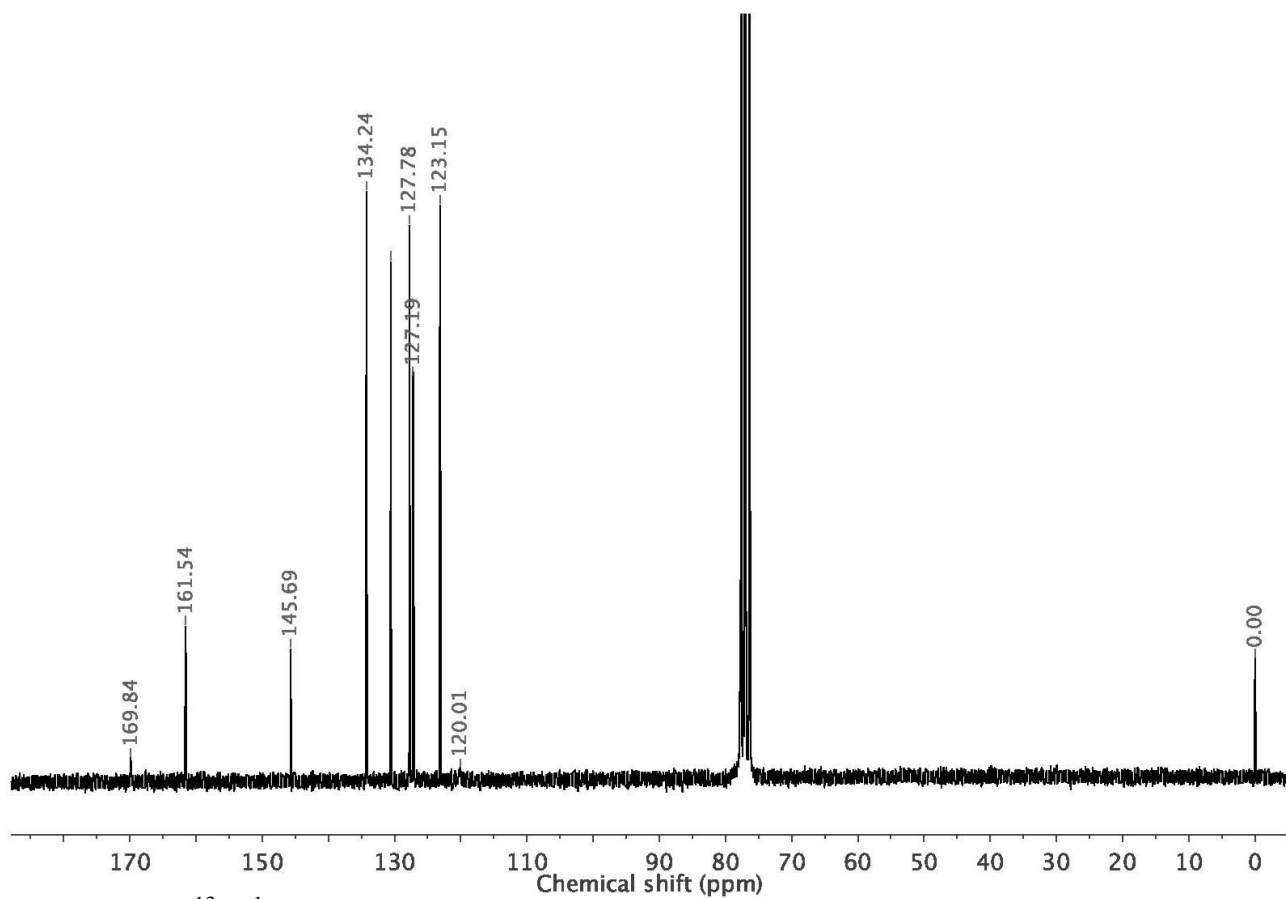

**Figure 11S.** <sup>13</sup>C{<sup>1</sup>H} NMR spectrum of diNC-5 in CDCl<sub>3</sub>.

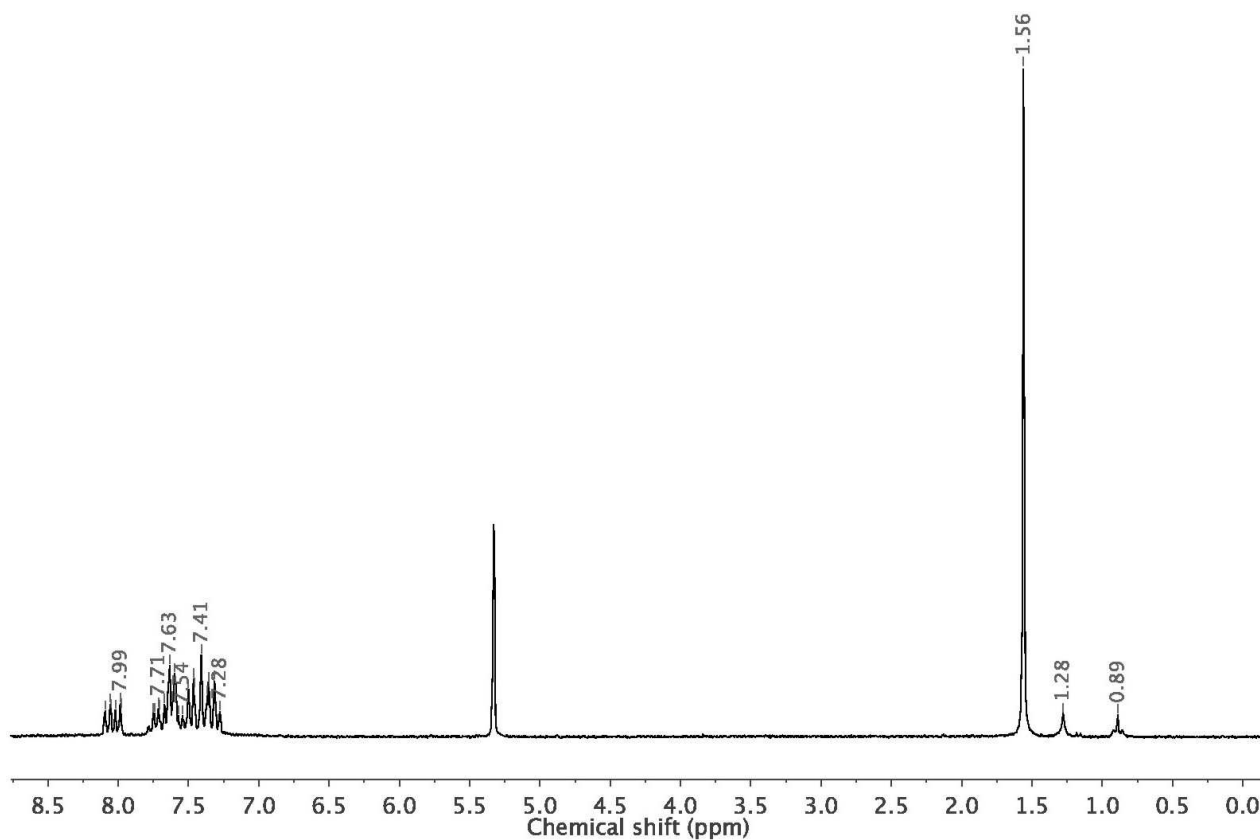

**Figure 12S.**  $^1\text{H}$  NMR spectrum of complex  $[\text{PtCl}_2(\text{diNC-1})]$  (**1**) in  $\text{CD}_2\text{Cl}_2$ .

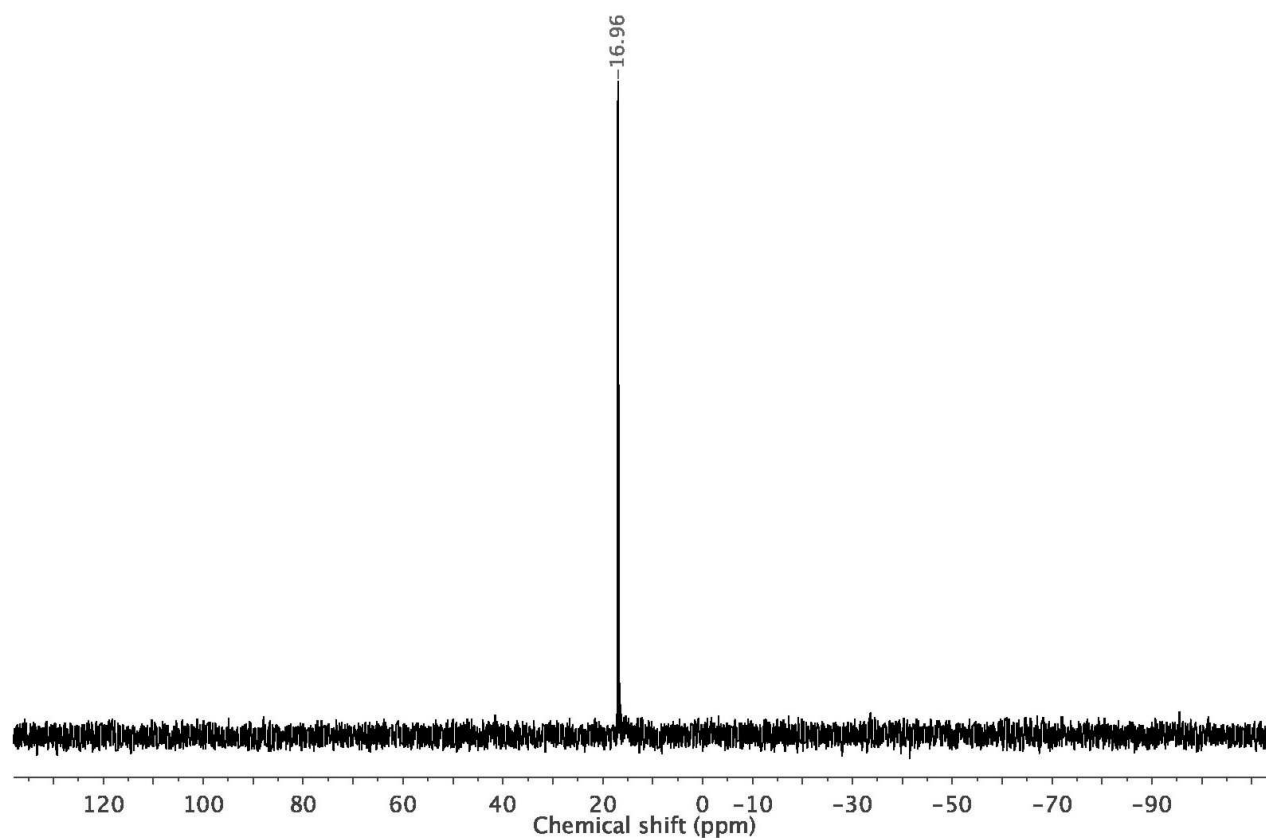

**Figure 13S.**  $^{31}\text{P}\{^1\text{H}\}$  NMR spectrum of complex  $[\text{PtCl}_2(\text{diNC-1})]$  (**1**) in  $\text{CD}_2\text{Cl}_2$ .

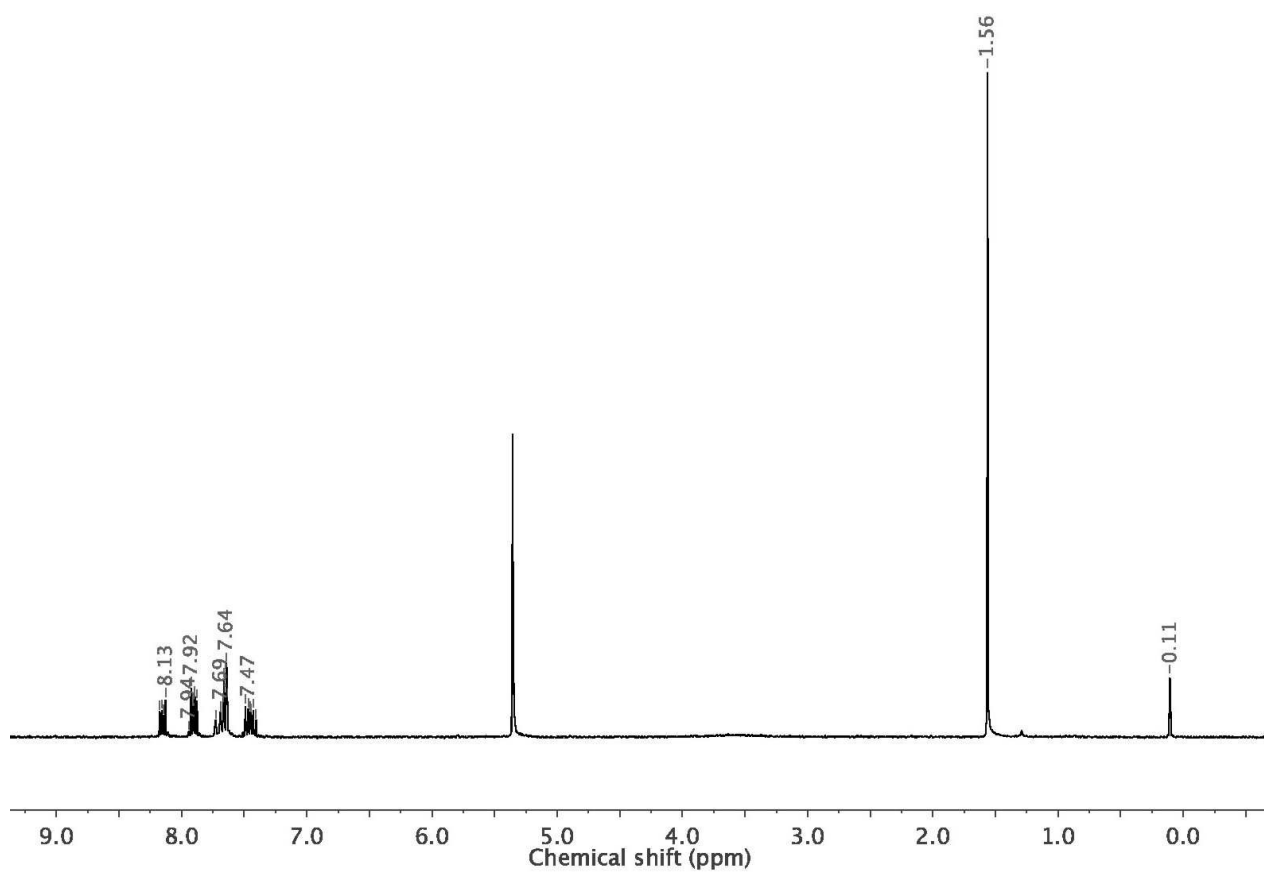

**Figure 14S.**  $^1\text{H}$  NMR spectrum of complex  $[\text{PtCl}_2(\text{diNC-2})]$  (**2**) in  $\text{CD}_2\text{Cl}_2$ .

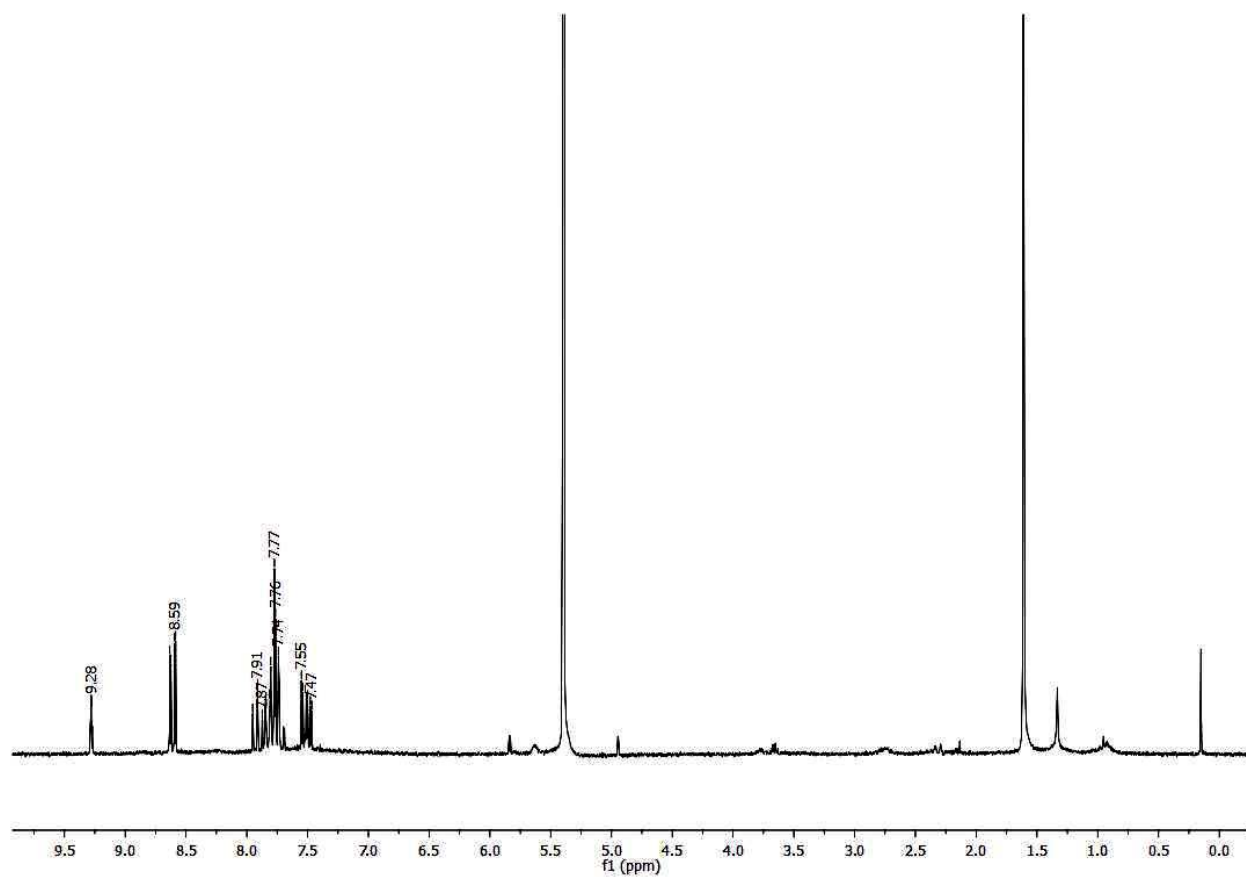

**Figure 15S.**  $^1\text{H}$  NMR spectrum of complex  $[\text{PtCl}_2(\text{diNC-3})]$  (**3**) in  $\text{CD}_2\text{Cl}_2$ .

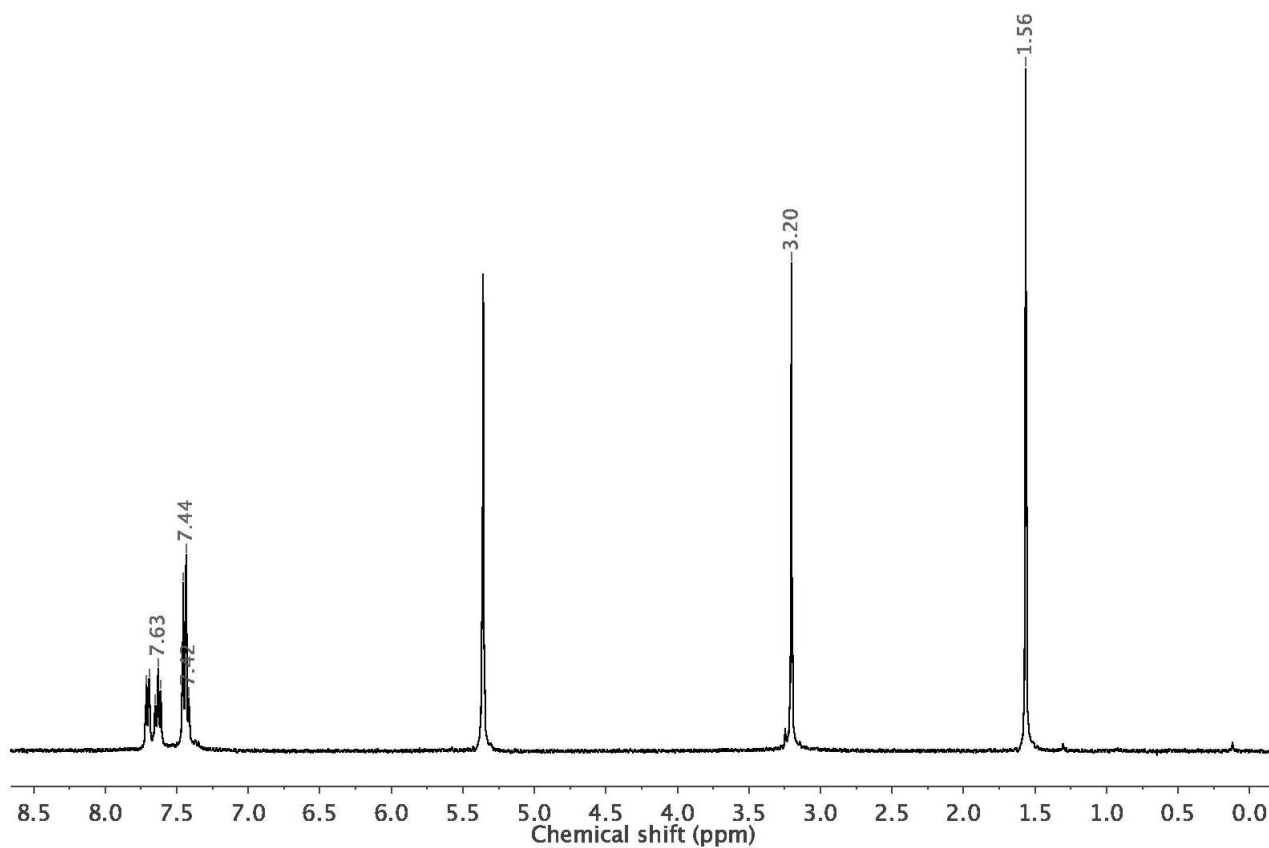

**Figure 16S.**  $^1\text{H}$  NMR spectrum of complex  $[\text{PtCl}_2(\text{diNC-4})]$  (4) in  $\text{CD}_2\text{Cl}_2$ .

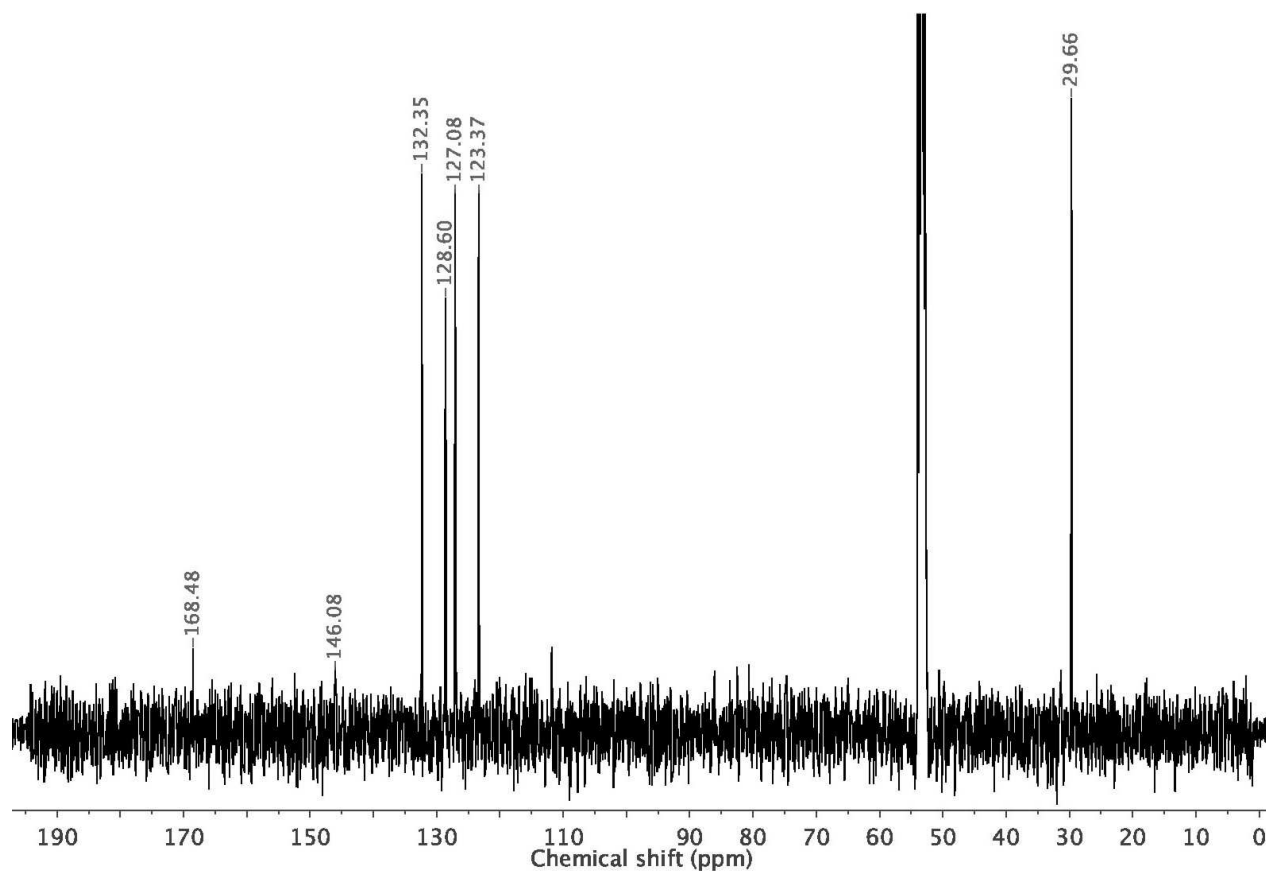

**Figure 17S.**  $^{13}\text{C}\{^1\text{H}\}$  NMR spectrum of complex  $[\text{PtCl}_2(\text{diNC-4})]$  (4) in  $\text{CDCl}_3$ .

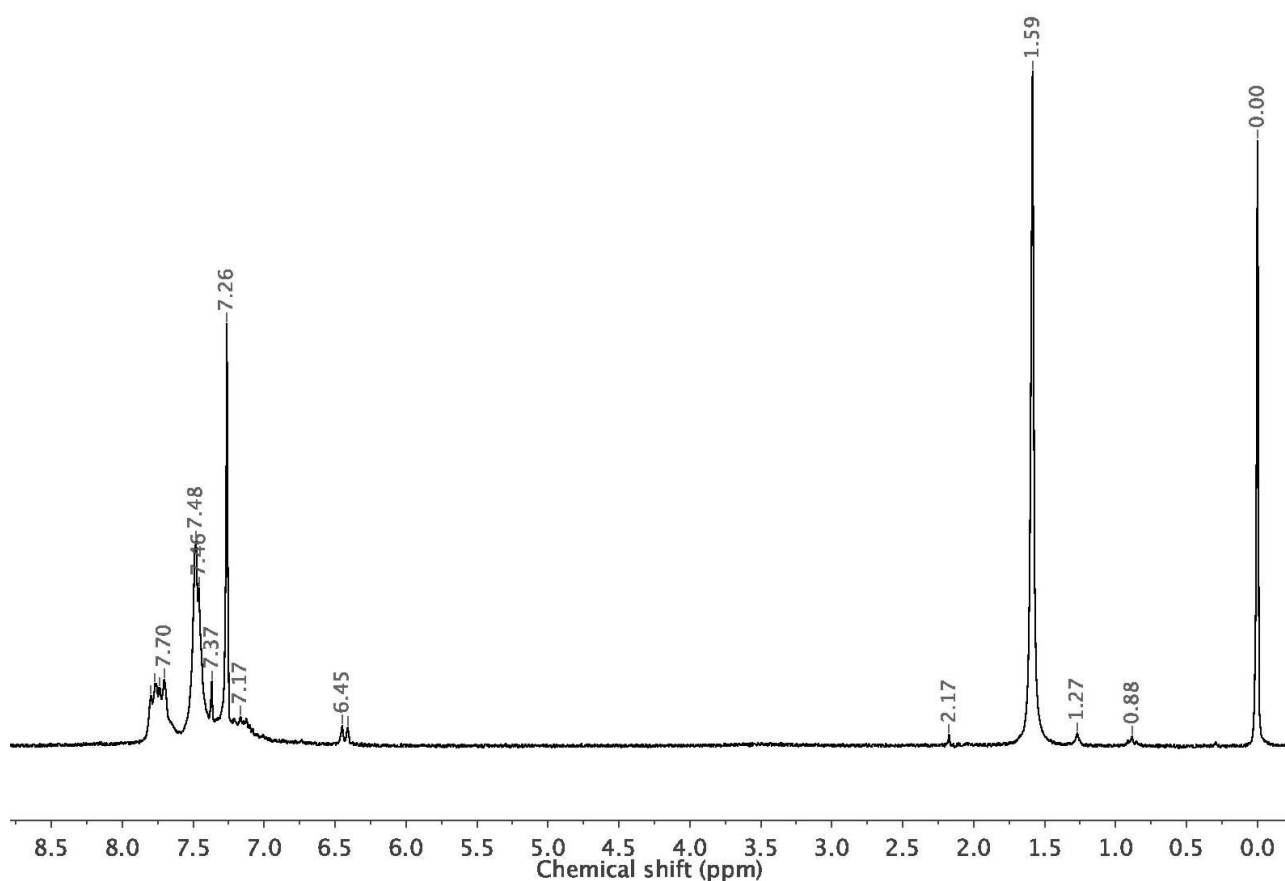

**Figure 18S.** <sup>1</sup>H NMR spectrum of complex [(μ-diNC-5){PtCl<sub>2</sub>(PPh<sub>3</sub>)<sub>2</sub>}] (5) in CDCl<sub>3</sub>.

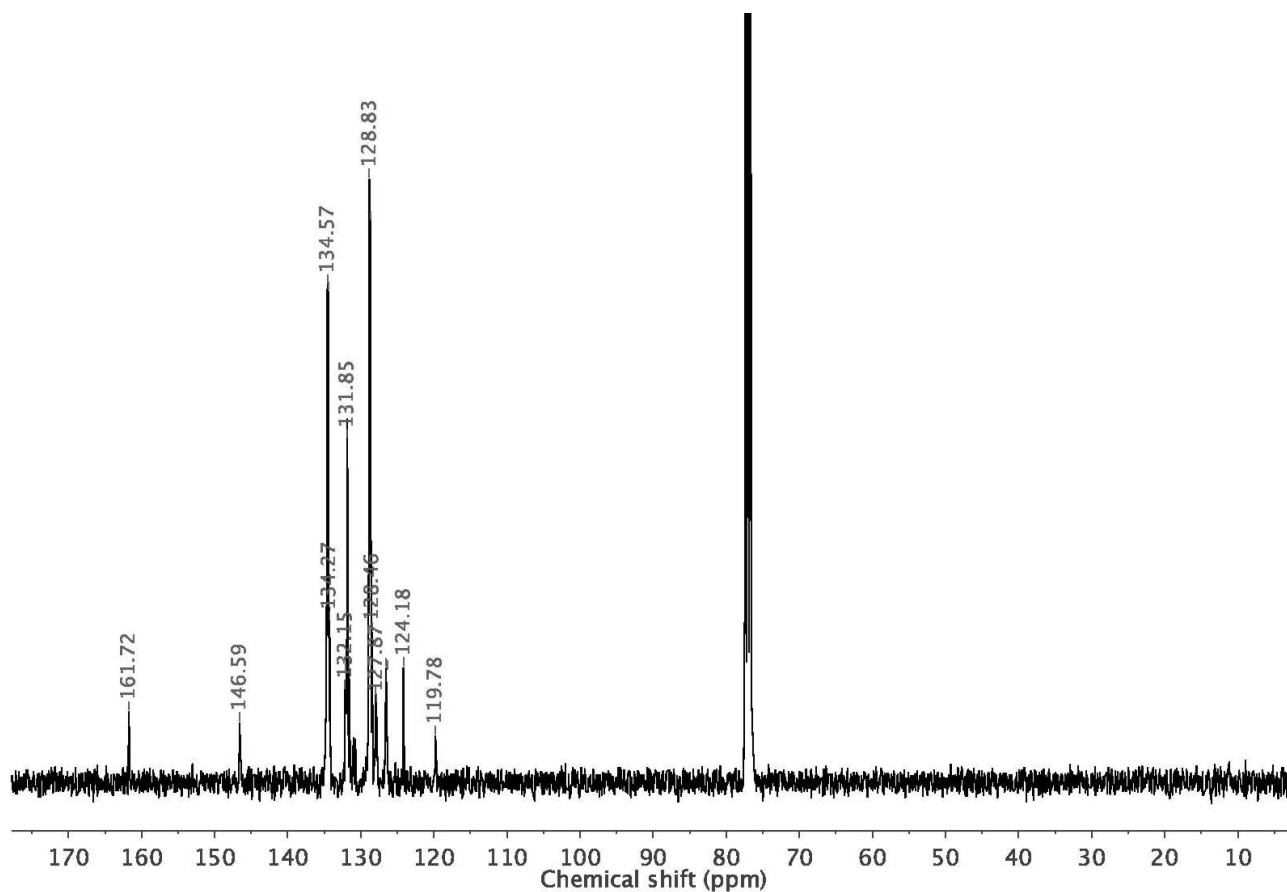

**Figure 19S.** <sup>13</sup>C{<sup>1</sup>H} NMR spectrum of complex [(μ-diNC-5){PtCl<sub>2</sub>(PPh<sub>3</sub>)<sub>2</sub>}] (5) in CDCl<sub>3</sub>.

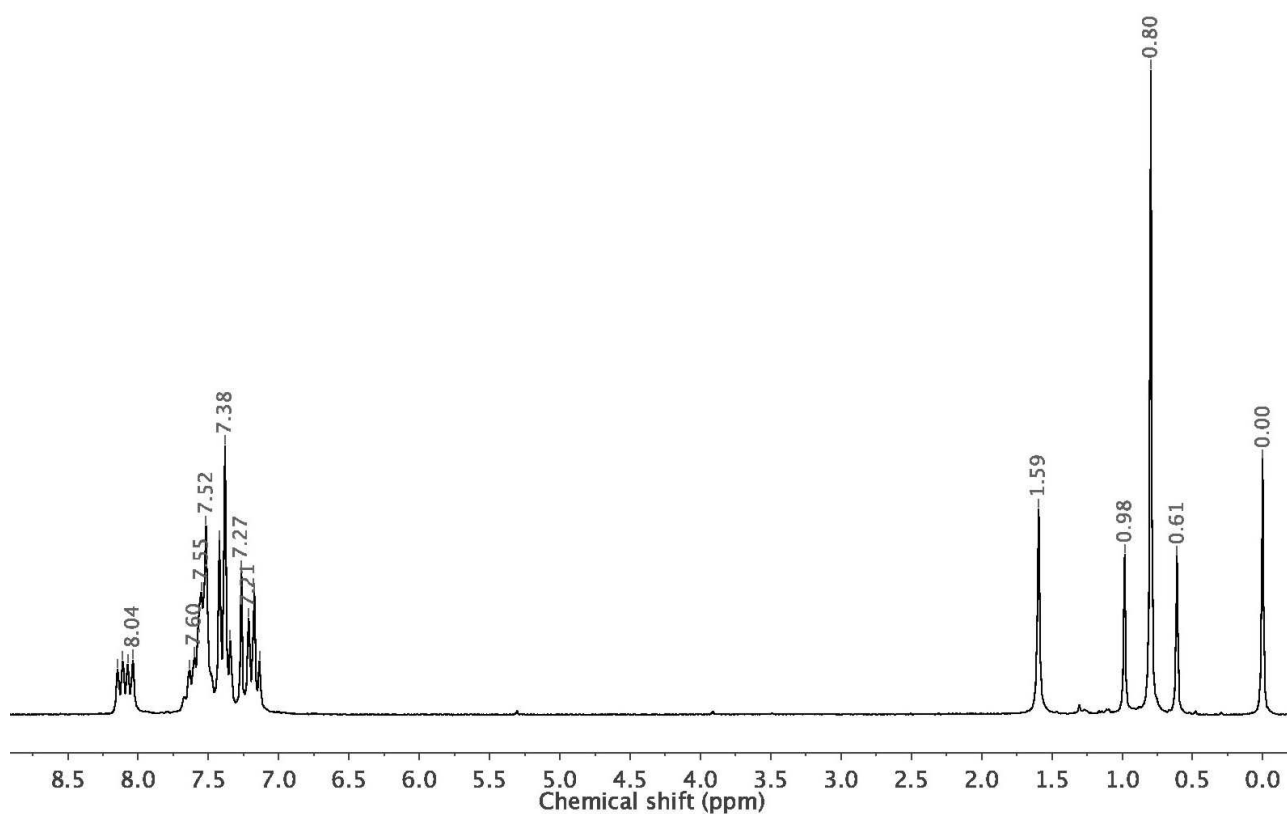

**Figure 20S.** <sup>1</sup>H NMR spectrum of complex [PtMe<sub>2</sub>(diNC-1)] (**1'**) in CDCl<sub>3</sub>.

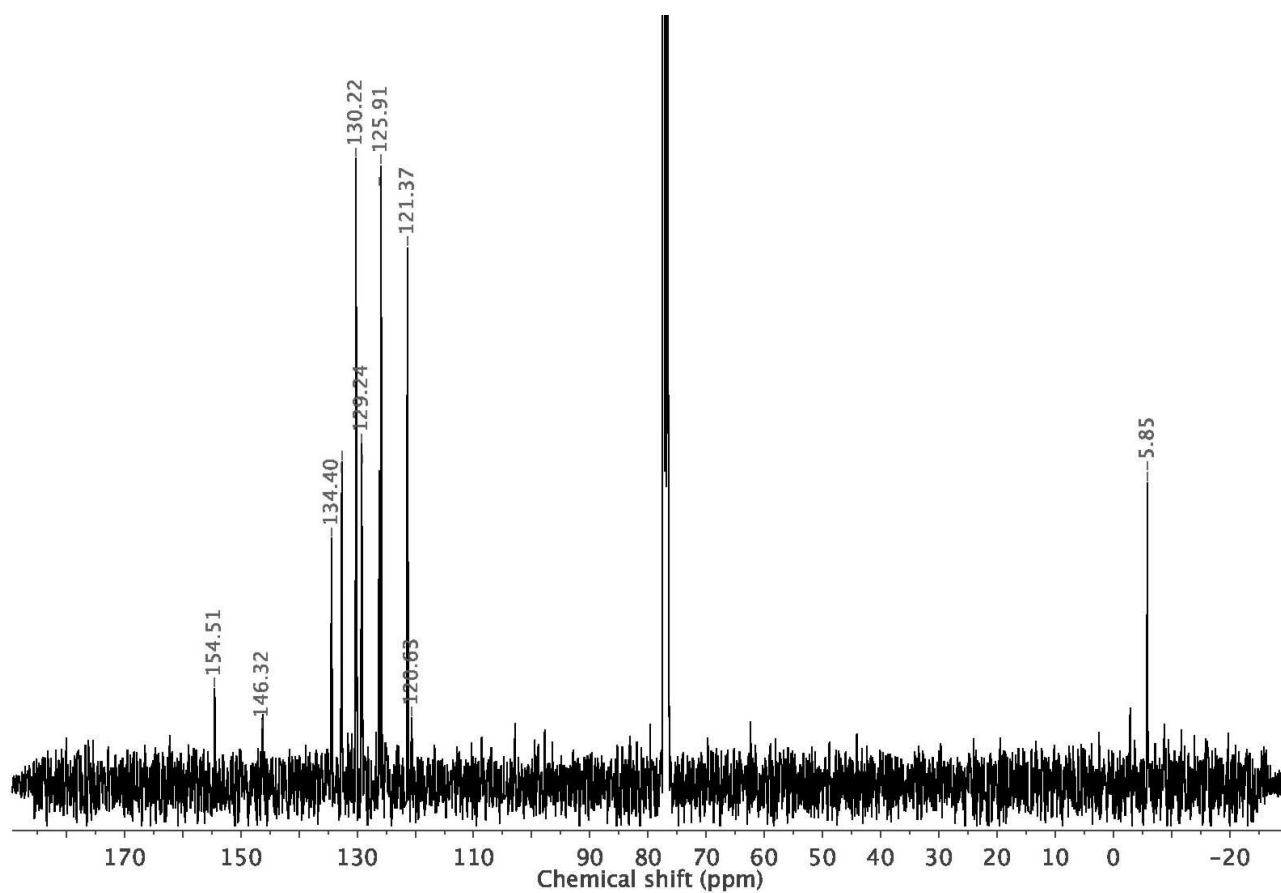

**Figure 21S.** <sup>13</sup>C{<sup>1</sup>H} NMR spectrum of complex [PtMe<sub>2</sub>(diNC-1)] (**1'**) in CDCl<sub>3</sub>.

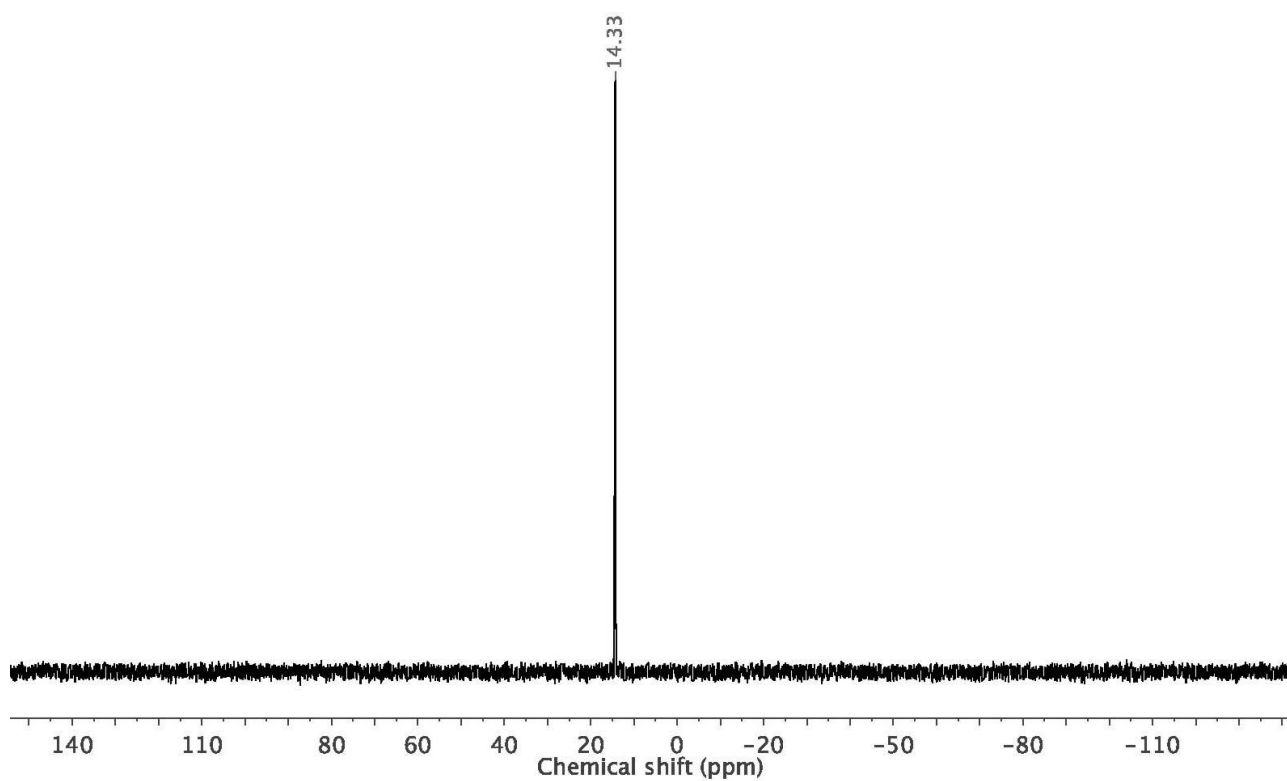

**Figure 22S.**  $^{31}\text{P}\{^1\text{H}\}$  NMR spectrum of complex  $[\text{PtMe}_2(\text{diNC-1})]$  (**1'**) in  $\text{CDCl}_3$ .

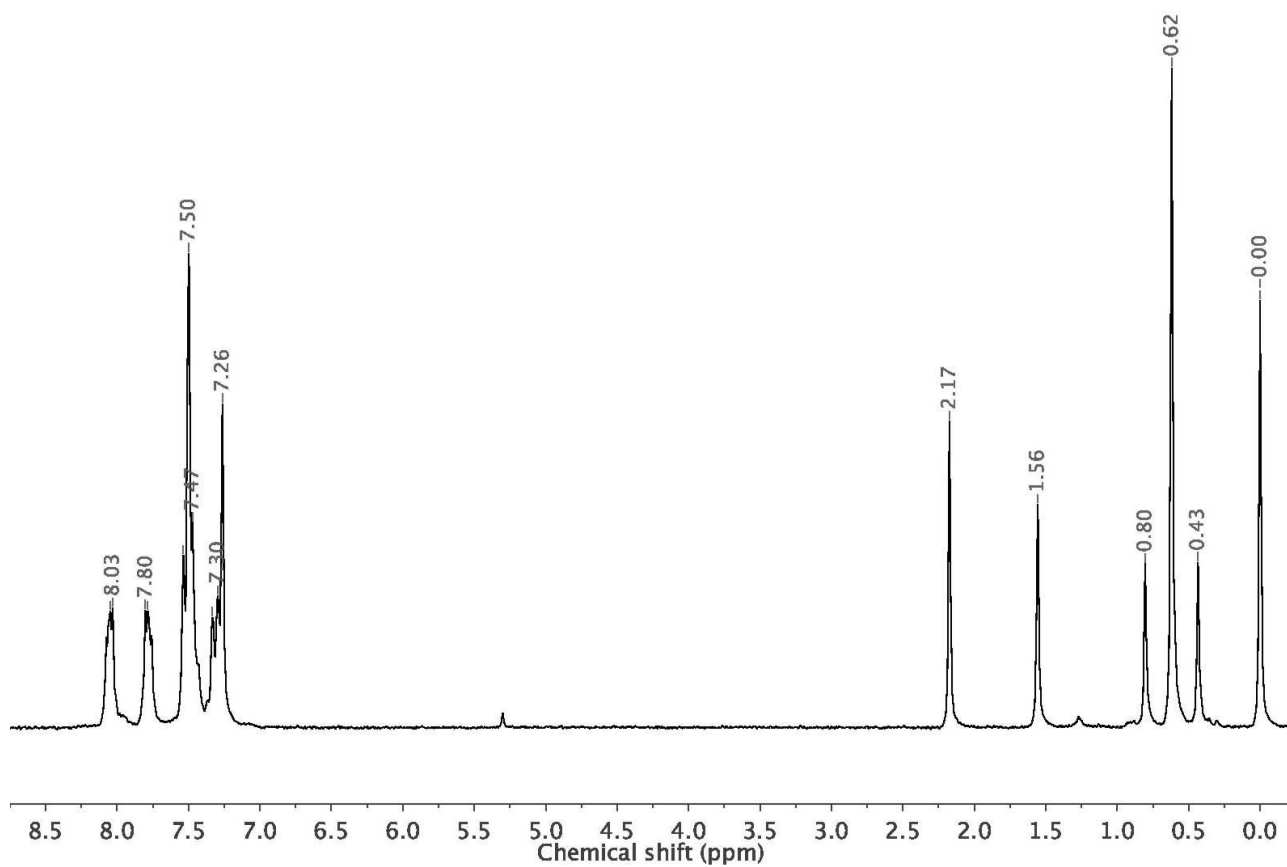

**Figure 23S.** <sup>1</sup>H NMR spectrum of complex [PtMe<sub>2</sub>(diNC-2)] (**2'**) in CDCl<sub>3</sub>.

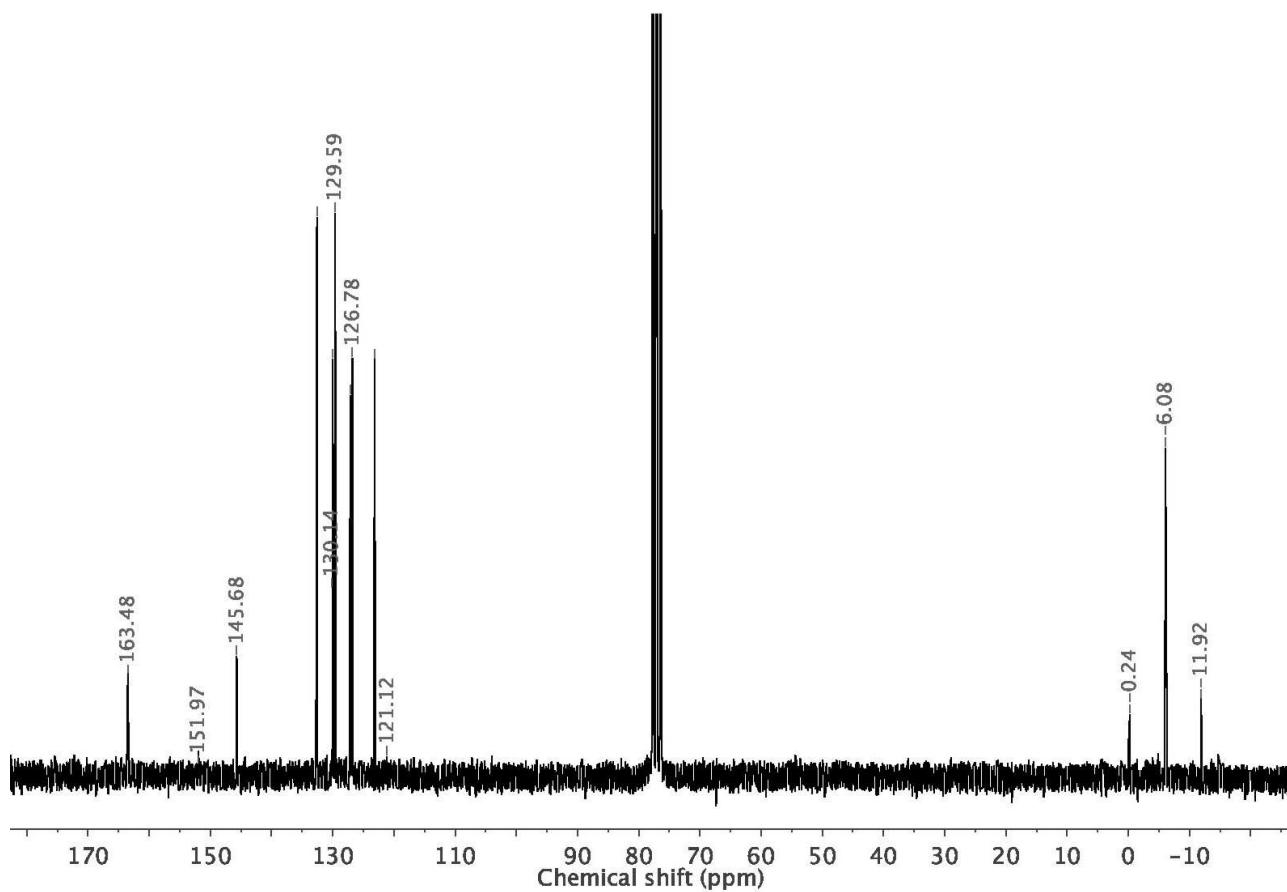

**Figure 24S.** <sup>13</sup>C{<sup>1</sup>H} NMR spectrum of complex [PtMe<sub>2</sub>(diNC-2)] (**2'**) in CDCl<sub>3</sub>.



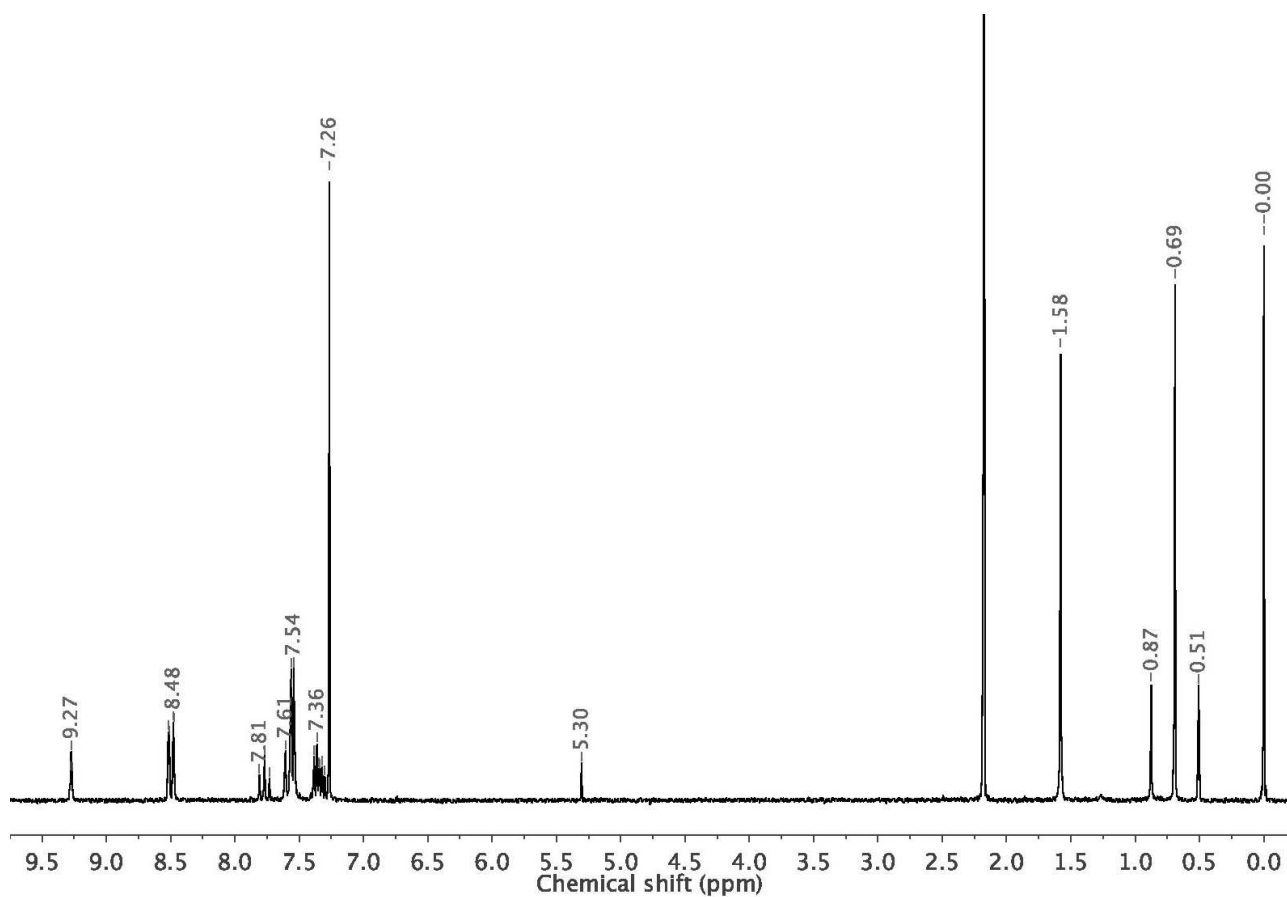

**Figure 25S.** <sup>1</sup>H NMR spectrum of complex [PtMe<sub>2</sub>(diNC-3)] (**3'**) in CDCl<sub>3</sub>.

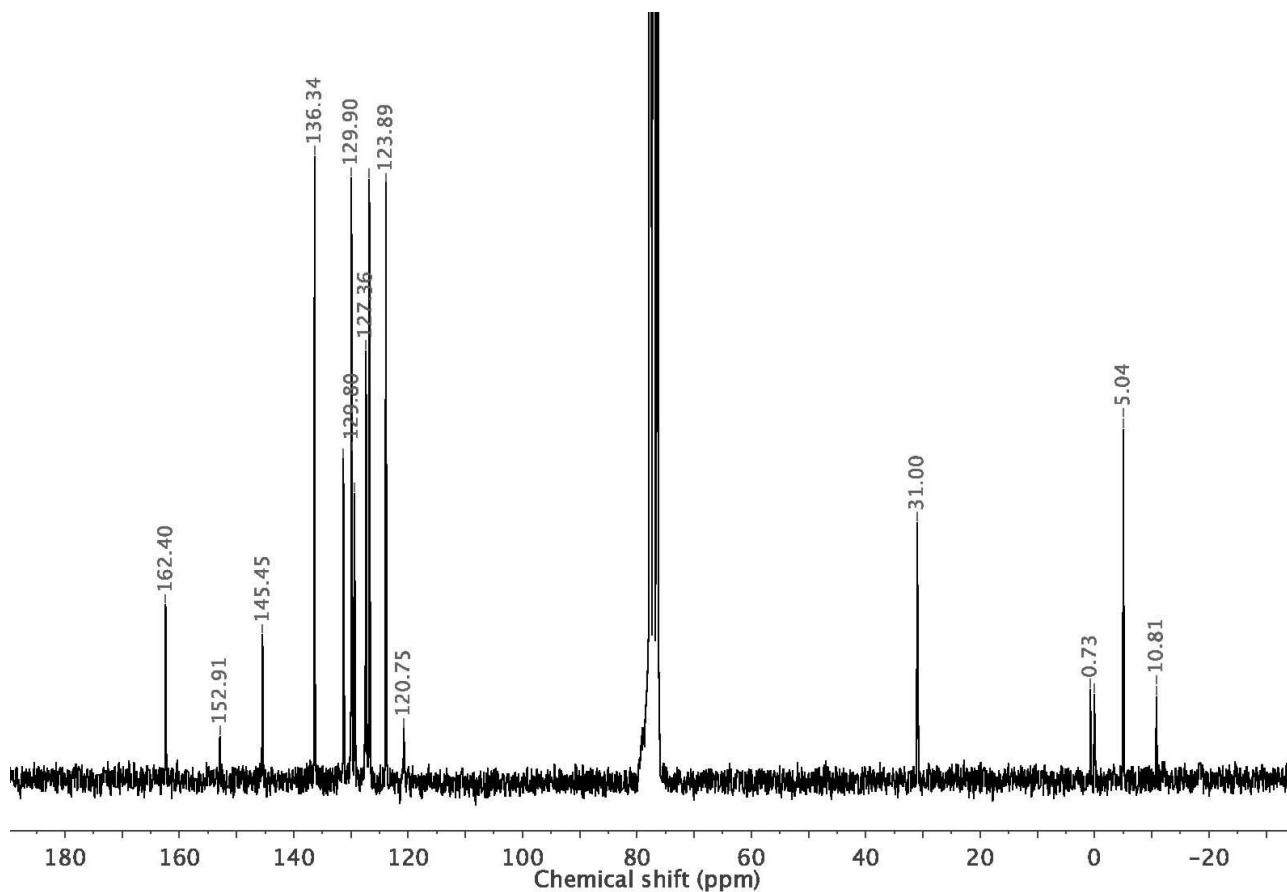

**Figure 26S.** <sup>13</sup>C{<sup>1</sup>H} NMR spectrum of complex [PtMe<sub>2</sub>(diNC-3)] (**3'**) in CDCl<sub>3</sub>.

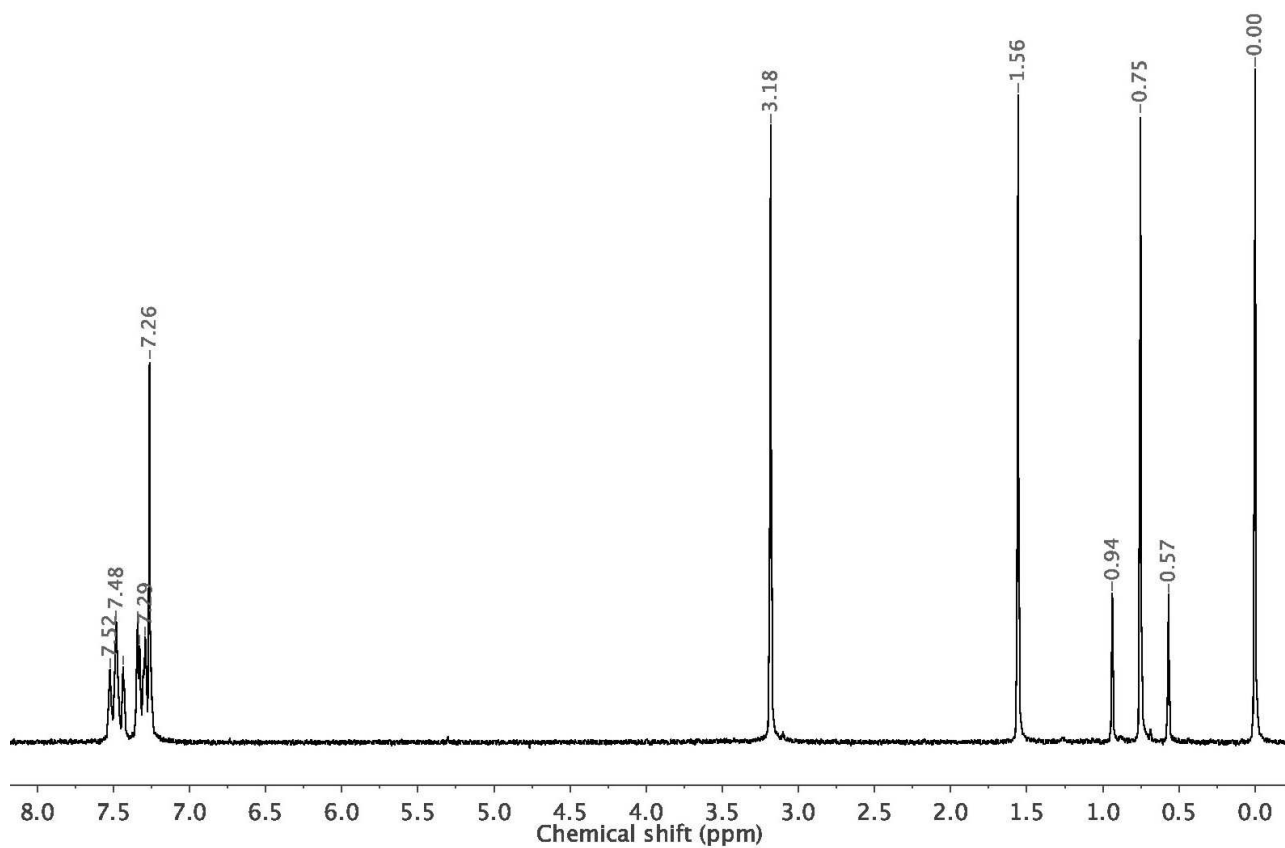

**Figure 27S.** <sup>1</sup>H NMR spectrum of complex [PtMe<sub>2</sub>(diNC-4)] (**4'**) in CDCl<sub>3</sub>.

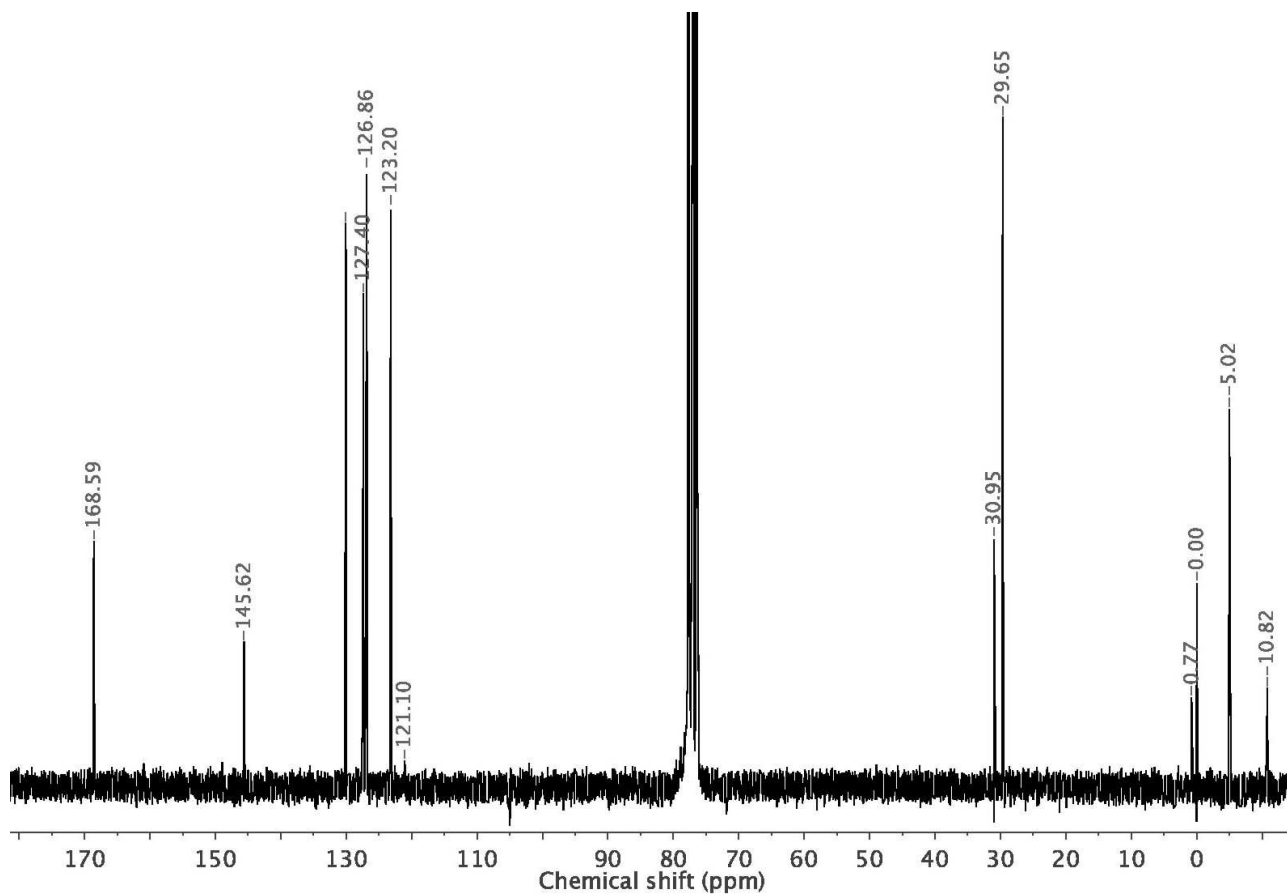

**Figure 26S.** <sup>13</sup>C{<sup>1</sup>H} NMR spectrum of complex [PtMe<sub>2</sub>(diNC-4)] (**4'**) in CDCl<sub>3</sub>.
